# Supplementary material
Source: PubMed Central journal article supplement (PMC9623453)
Supplement: mmc1.pdf [file mmc1.pdf]

**Supplemental information**

**Pre-infection antiviral innate immunity**

**contributes to sex differences**

**in SARS-CoV-2 infection**

**Natalie Sauerwald, Zijun Zhang, Irene Ramos, Venugopalan D. Nair, Alessandra Soares-Schanoski, Yongchao Ge, Weiguang Mao, Hala Alshammery, Ana S. Gonzalez-Reiche, Adriana van de Guchte, Carl W. Goforth, Rhonda A. Lizewski, Stephen E. Lizewski, Mary Anne S. Amper, Mital Vasoya, Nitish Seenarine, Kristy Guevara, Nada Marjanovic, Clare M. Miller, German Nudelman, Megan A. Schilling, Rachel S.G. Sealfon, Michael S. Termini, Sindhu Vangeti, Dawn L. Weir, Elena Zaslavsky, Maria Chikina, Ying Nian Wu, Harm Van Bakel, Andrew G. Letizia, Stuart C. Sealfon, and Olga G. Troyanskaya**

## Supplementary Materials: Pre-infection antiviral innate immunity contributes to sex differences in SARS-CoV-2 infection

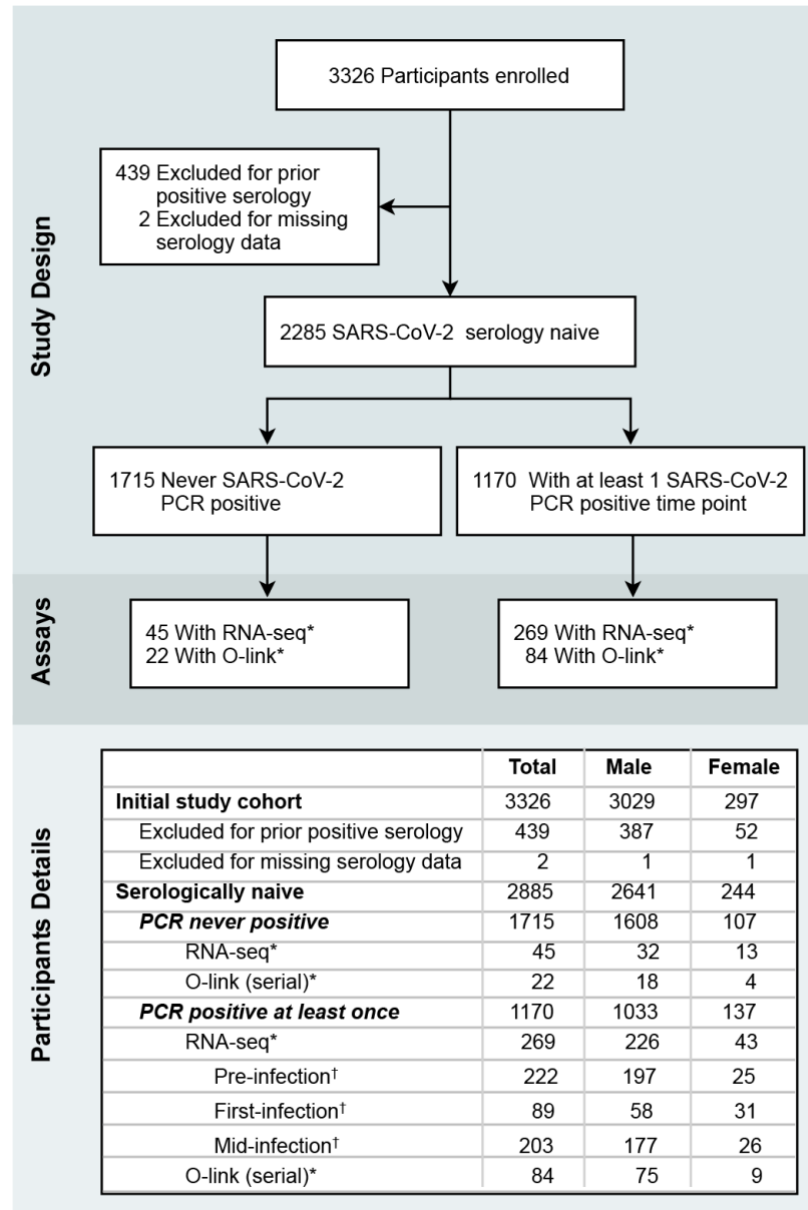

**Fig. S1.**

### Study description.

\* Numbers refer to unique participants with at least one sample, not total sample counts.

† Categories are non-exclusive, one subject can have samples across multiple time points.

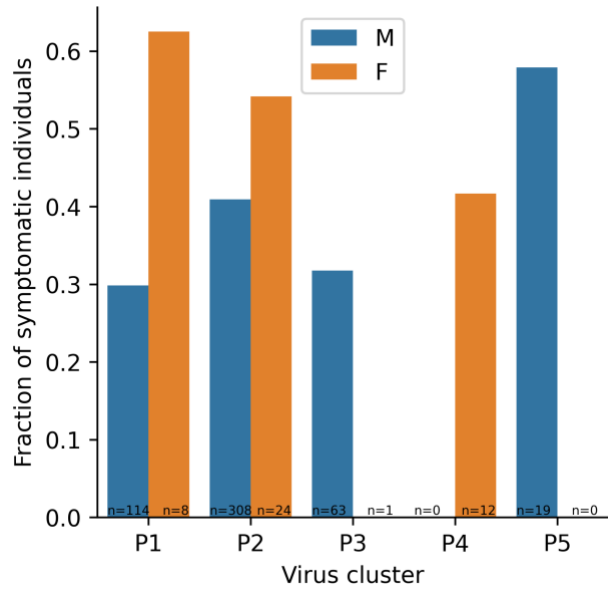

**Fig. S2.**

**Symptomatic rate across sequenced virus clusters.**

Phylogenetic analysis of over 600 infections revealed 5 main virus clusters that mostly infected individuals in the same company. For the only two clusters with multiple infections in both males and females, we observe higher symptomatic rates among females than males.

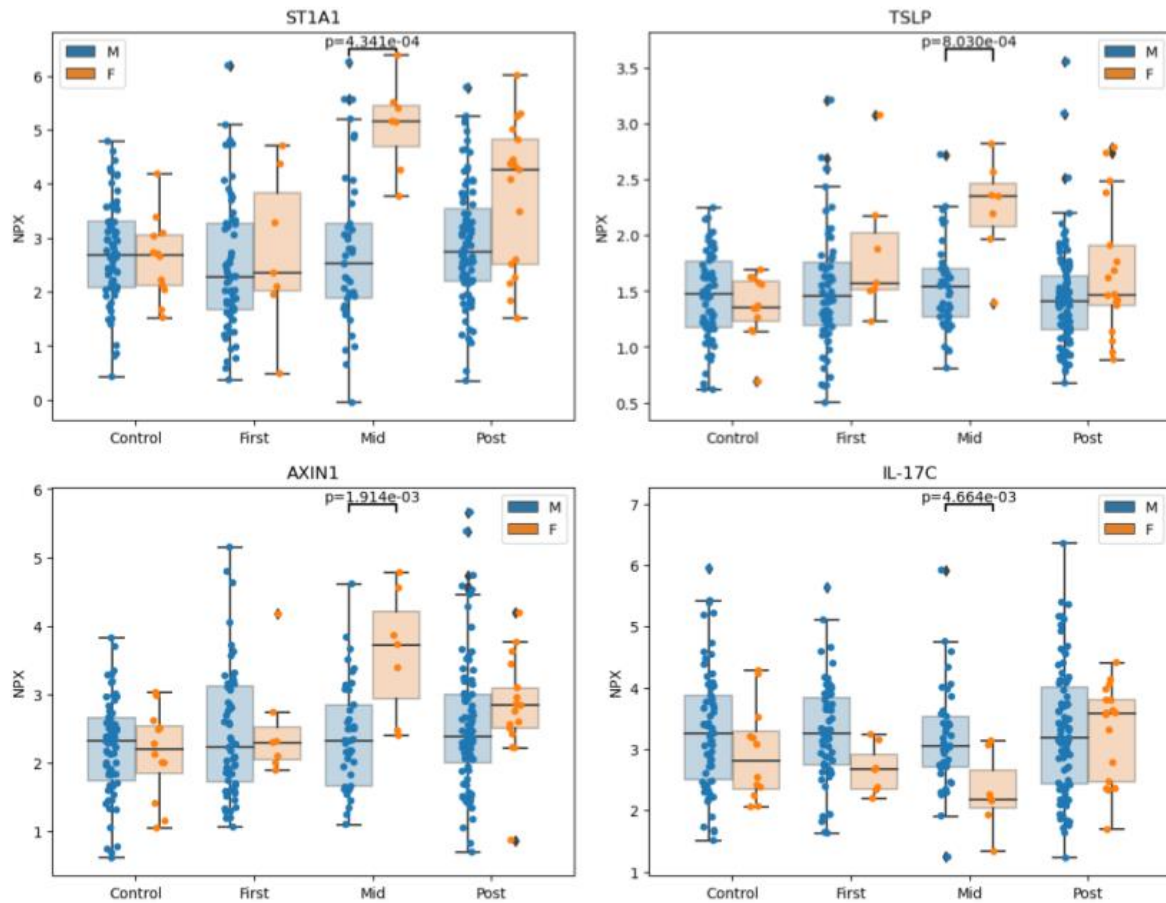

**Fig. S3.**

**Examples of sex-specific inflammatory proteins.** Boxplots show the normalized protein expression (NPX) levels of ST1A1 (upper left), TSLP (upper right), IL-17C (lower right), and AXIN1 (lower left). ST1A1, TSLP, and AXIN1 all show statistically significantly higher protein levels in Mid samples from females, while IL-17C shows lower levels in Mid female samples as compared to Mid male samples.

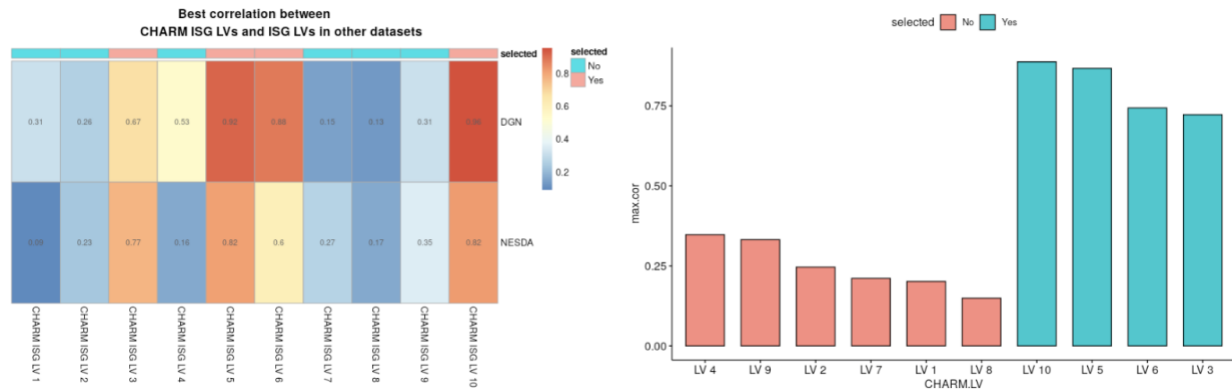

**Fig. S4.**

**Factor analysis of ISG latent variables in CHARM and two independent cohorts.** Matrix factorization resulted in 10 latent variables from the ISG levels of CHARM control samples. Four of these (LVs 3, 5, 6, and 10) showed significantly high correlations across all three data sets, as shown in the heatmap on the left, suggesting that these are biologically consistent across a broad population base. The bar plot on the right shows the maximum correlation values between data sets for all 10 LVs, highlighting the four functionally relevant that were selected for further analysis.

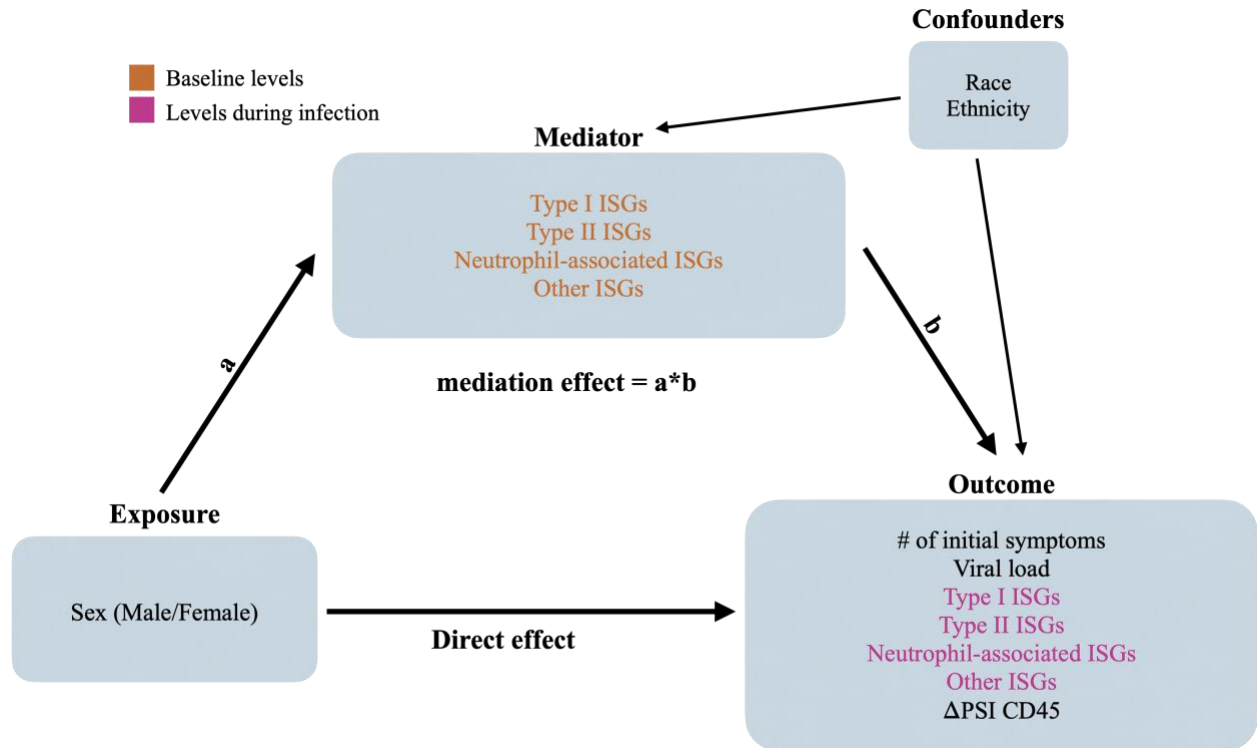

**Fig. S5.** Causal mediation diagram shows the analytical framework for the causal mediation analysis performed. Each mediator was tested for significant mediation effect of the sex exposure for each outcome listed, while controlling for race and ethnicity. Additionally, we tested the mediation of all four ISG LVs during infection on the symptoms measured throughout infection.

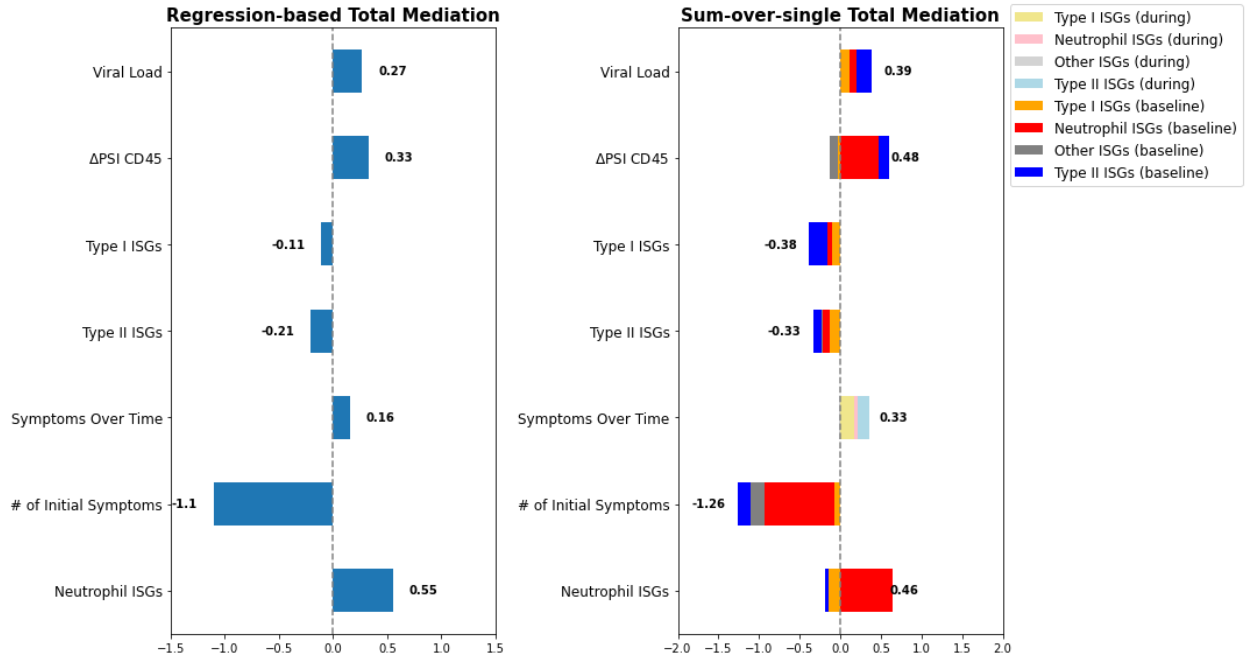

**Fig. S6.**

**Multiple-mediator analysis largely agrees with the results from testing each mediator individually.** In consideration of the possible correlations between mediators, multiple-mediator analysis was performed to compute the total mediation effect of each variable (left). These results are consistent with the sums of each individual mediation effect shown in the stacked bar chart (right). For both graphs, the x-axis shows the proportion of mediation effect.

| <b>Ethnicity</b> | <b>Number of participants</b> |
|------------------|-------------------------------|
| Non-Hispanic     | 1457                          |
| Hispanic         | 630                           |
| Not reported     | 798                           |

| <b>Race</b>  | <b>Number of participants</b> |
|--------------|-------------------------------|
| White        | 2121                          |
| Black        | 398                           |
| Multi-racial | 80                            |
| Asian        | 69                            |
| Other        | 44                            |
| AI/AN        | 30                            |
| Hawaiian/OPI | 12                            |
| Not reported | 131                           |

| <b>Age</b> | <b>Number of participants</b> |
|------------|-------------------------------|
| 18         | 1622                          |
| 19         | 606                           |
| 20         | 238                           |
| 21         | 133                           |
| 22         | 97                            |
| 23         | 63                            |
| 24         | 45                            |
| 25         | 23                            |
| 26         | 13                            |
| 27         | 18                            |
| 28         | 19                            |
| 29         | 4                             |
| 30         | 1                             |
| 31         | 2                             |
| 36         | 1                             |

| <b>Sex</b> | <b>Number of participants</b> |
|------------|-------------------------------|
| Male       | 2641                          |
| Female     | 244                           |

**Table S1.**  
Demographics of CHARM cohort.



| <b>Protein</b> | <b>Sex-specific</b> | <b>p-value</b> |
|----------------|---------------------|----------------|
| SCF            | M                   | 0.000895       |
| IL-17C         | M                   | 0.004664       |
| AXIN1          | F                   | 0.001914       |
| TSLP           | F                   | 0.000803       |
| TNFSF14        | F                   | 0.005521       |
| SIRT2          | F                   | 0.005999       |
| DNER           | M                   | 0.005076       |
| CASP-8         | F                   | 0.003018       |
| ST1A1          | F                   | 0.000434       |

**Table S2.**

O-link proteins with significant differences between males and females.
